# Supplementary material
Source: ML conference proceedings conference paper supplement (https://openreview.net/forum?id=o9YkHqBE5I)

Annotation Time per Annotator

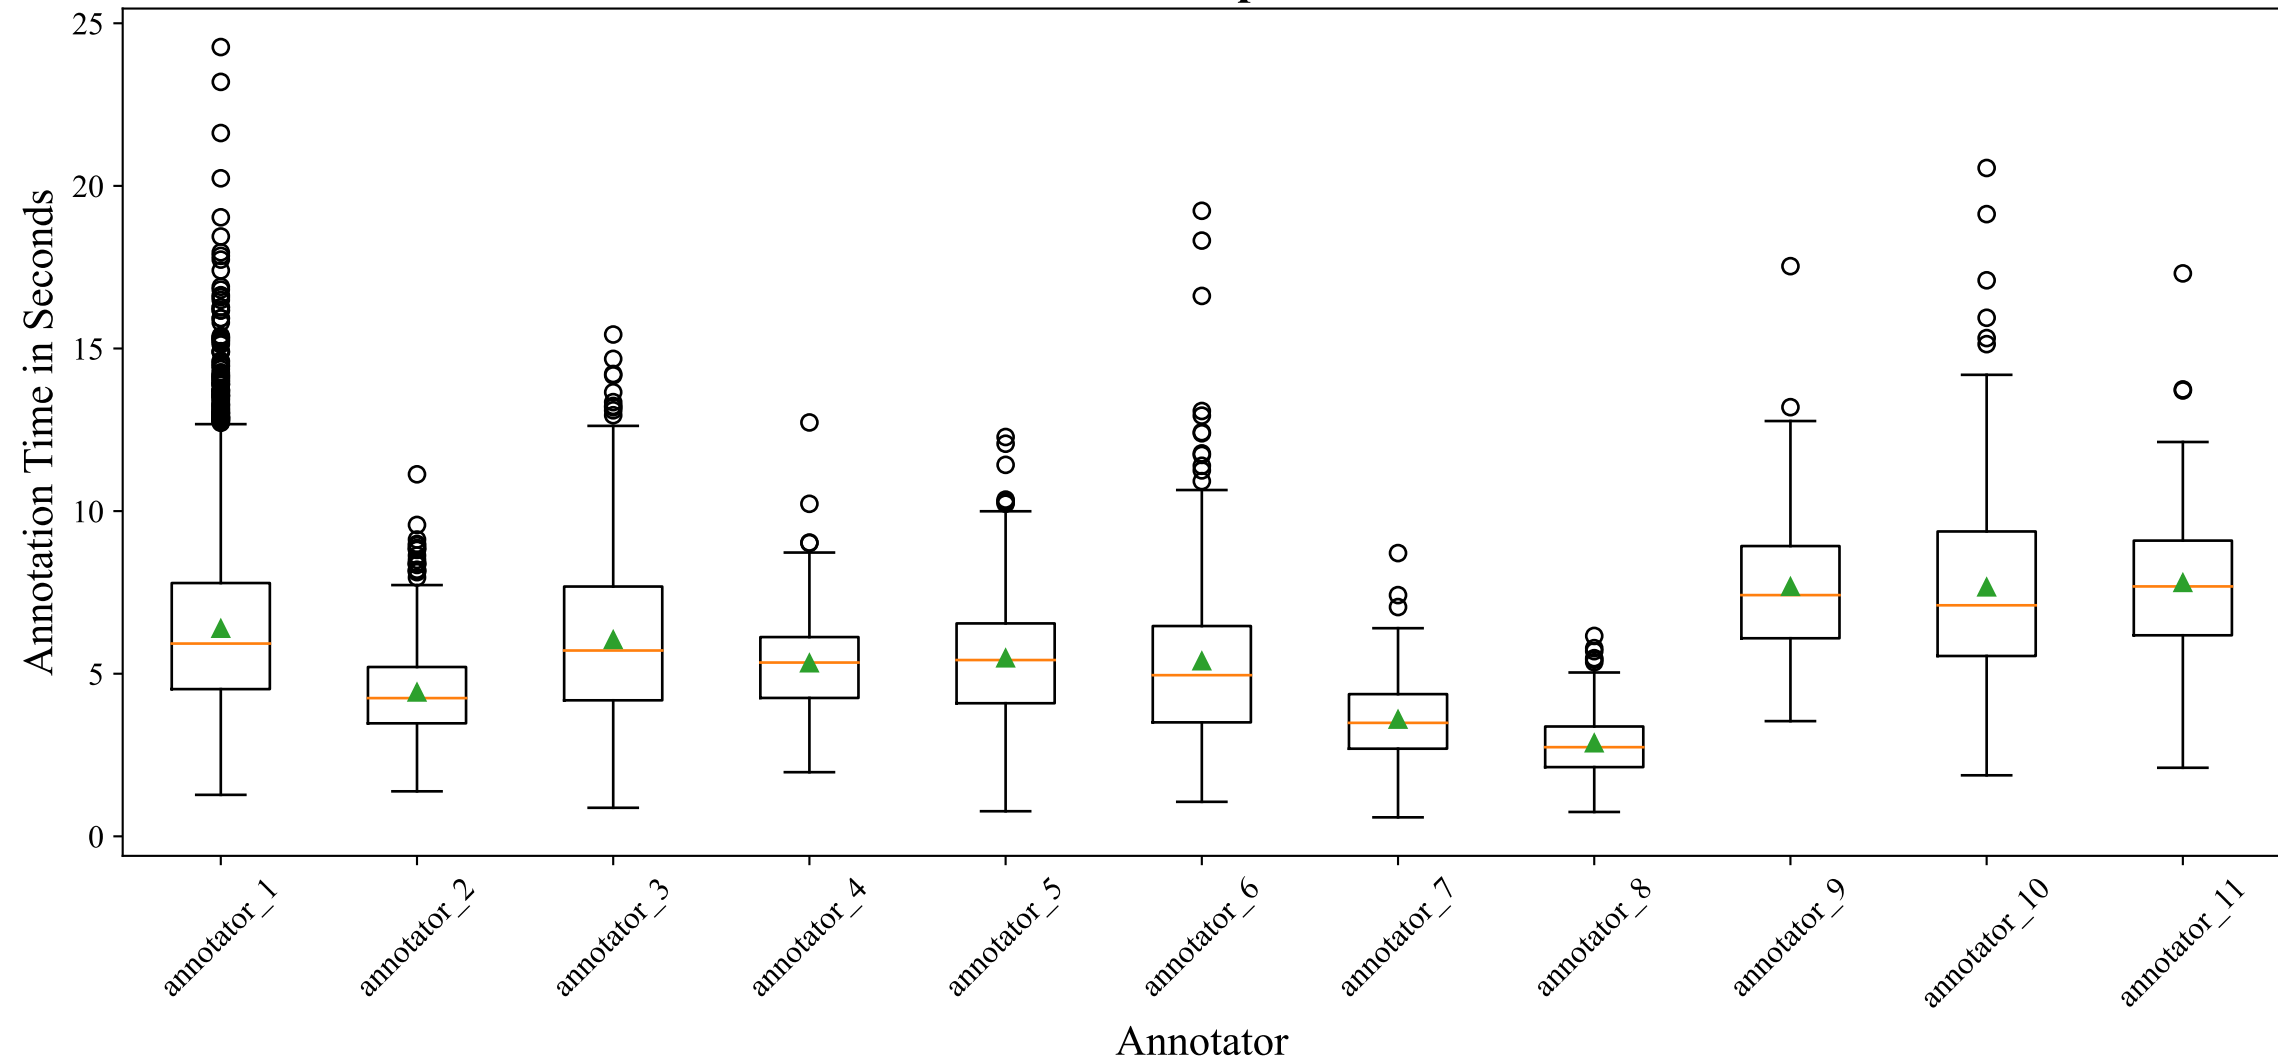

Supplement: supplementary_material [file attachment]

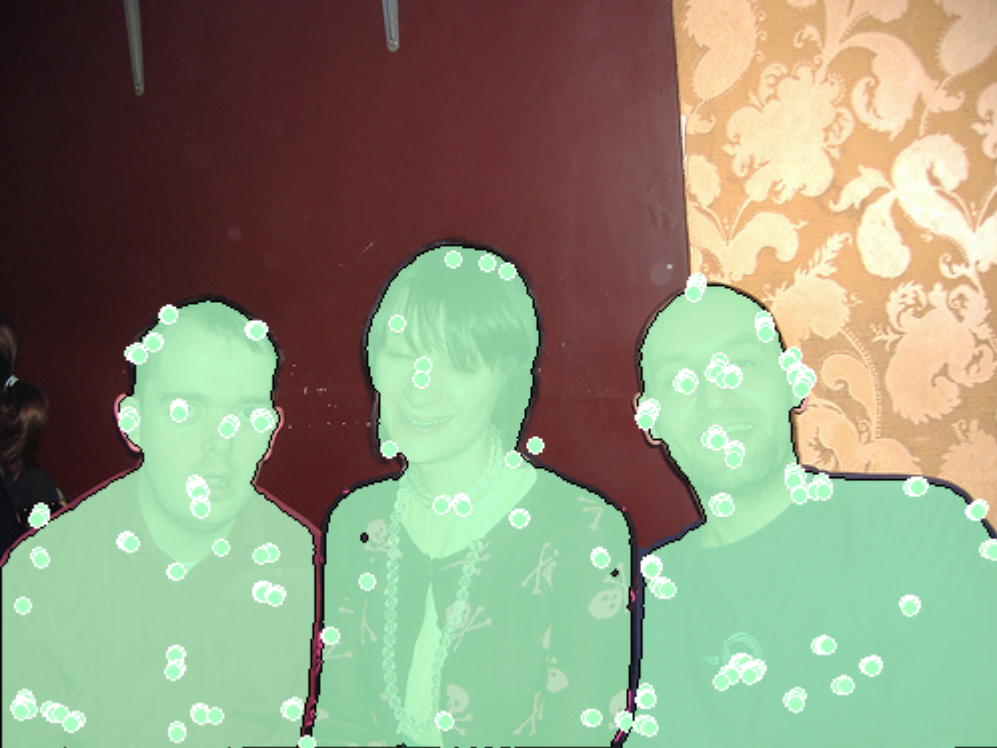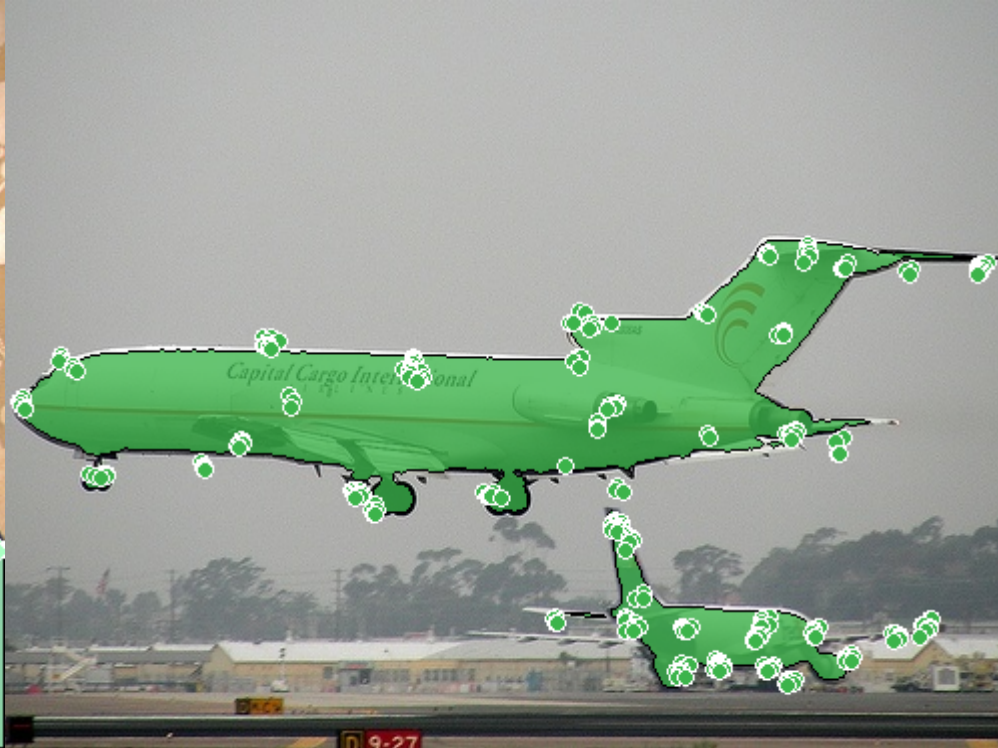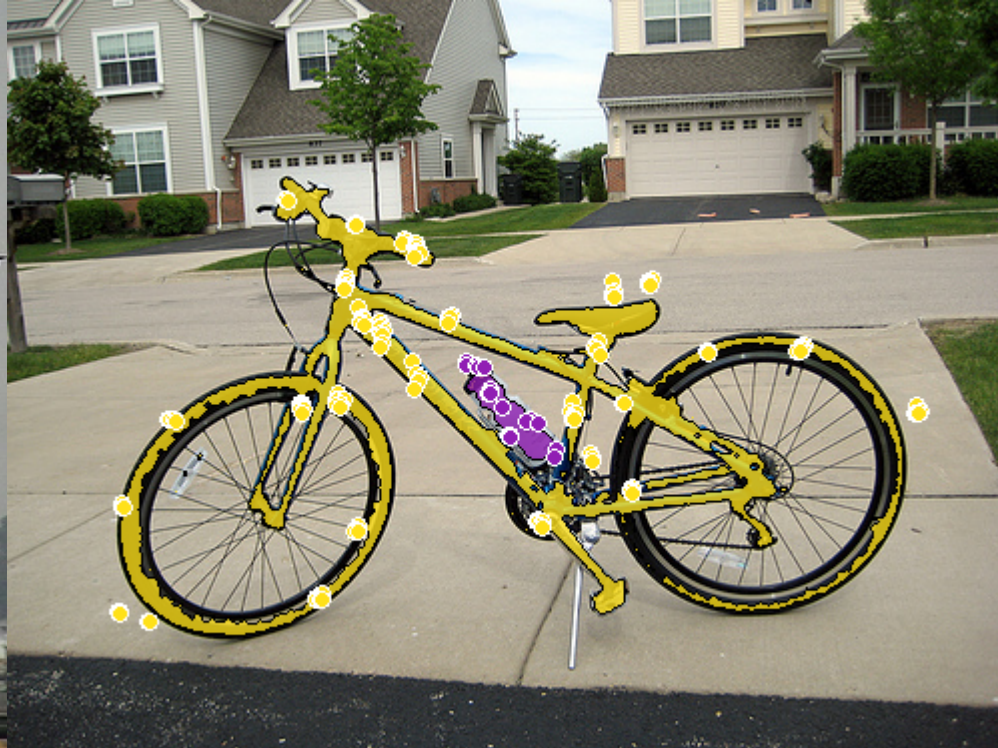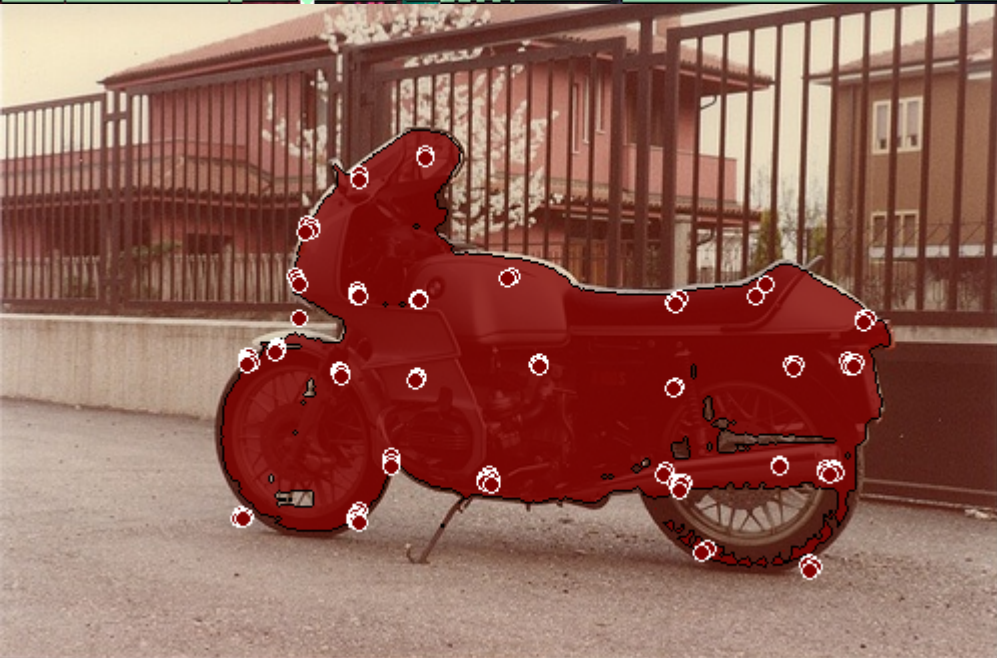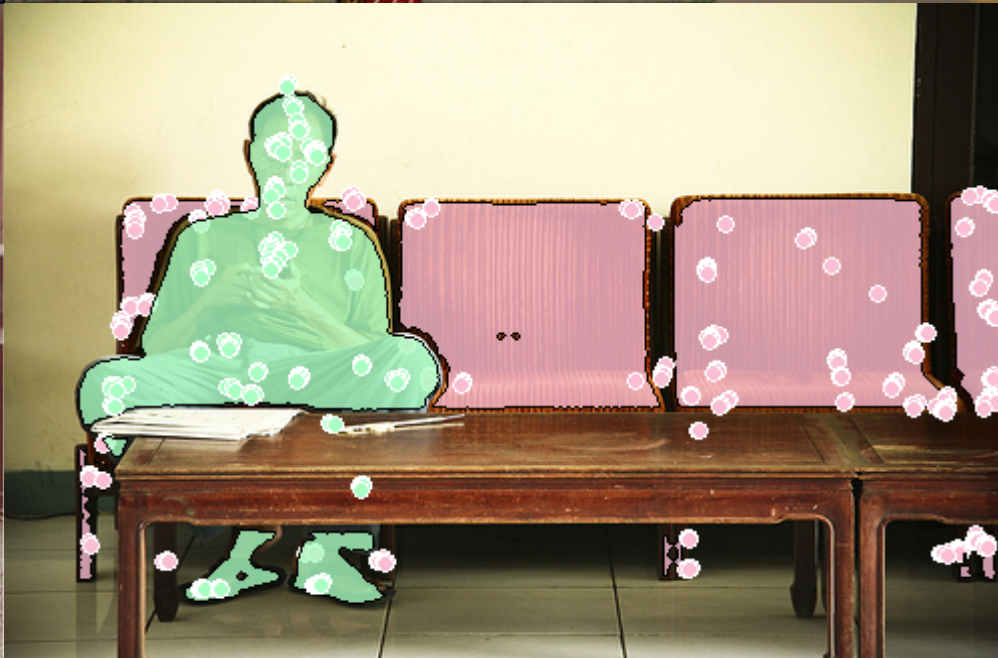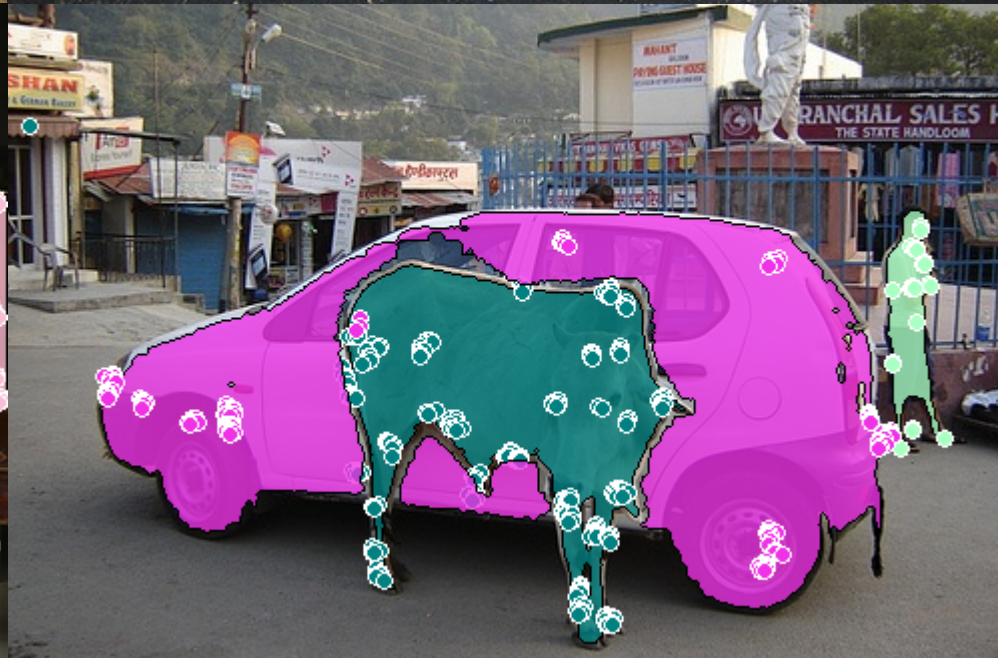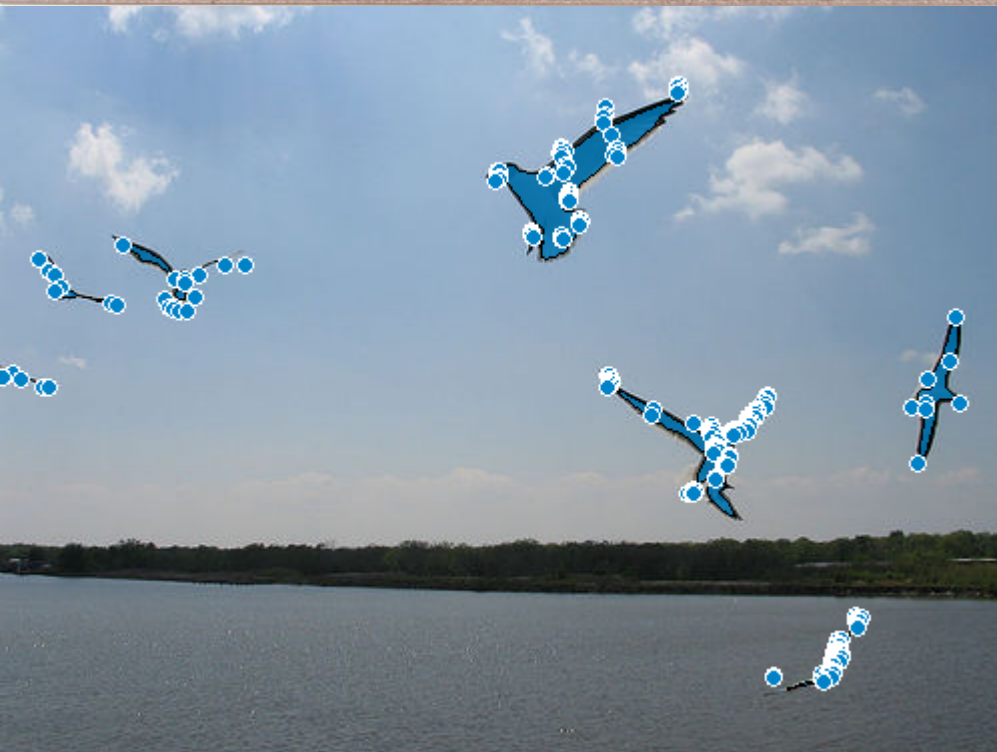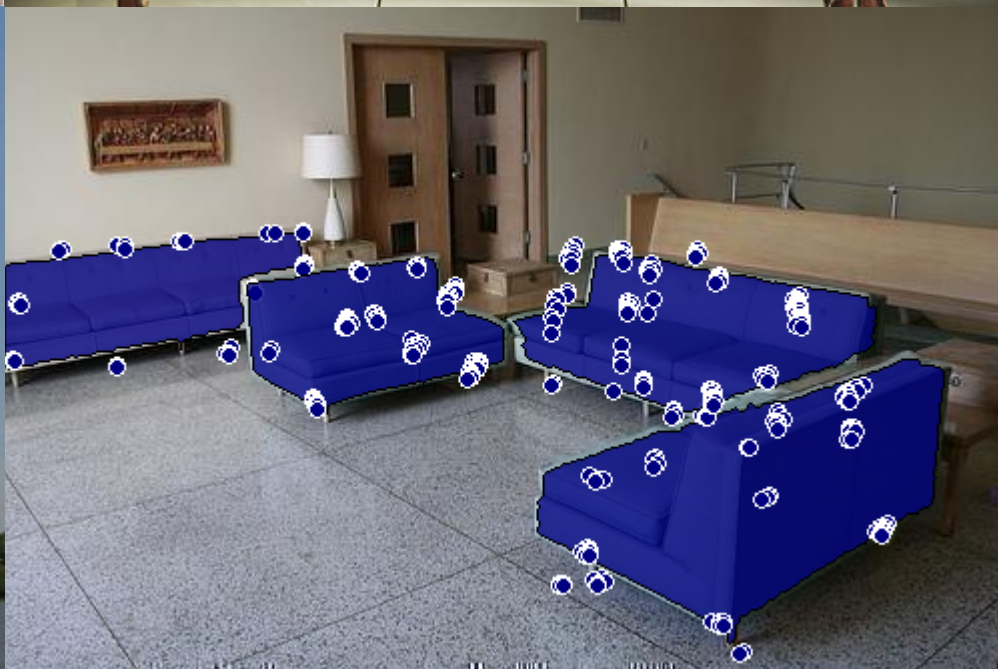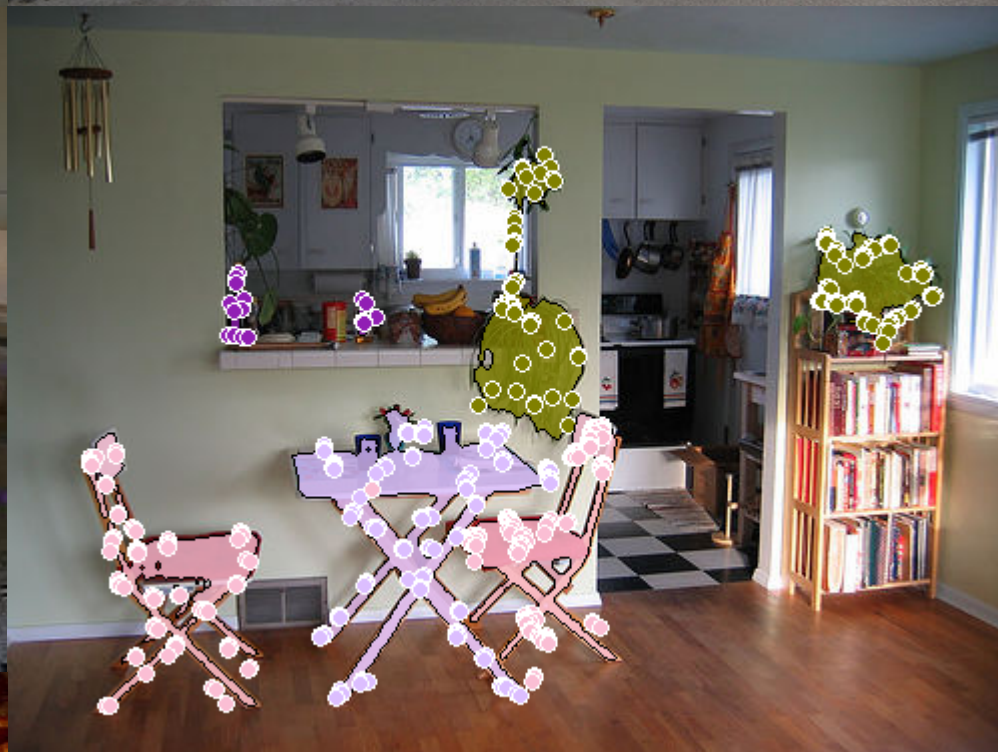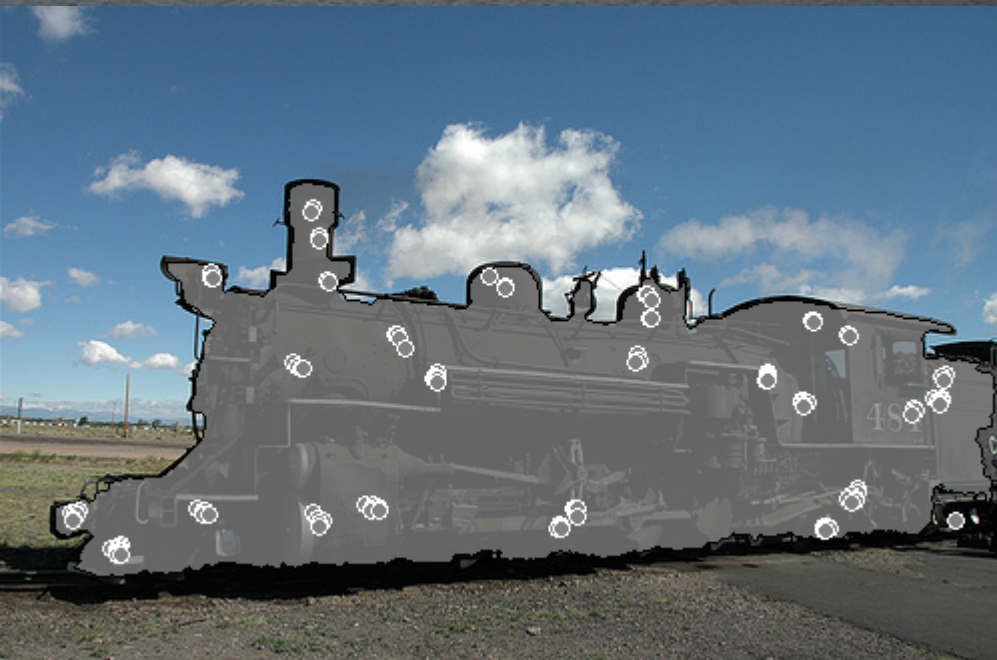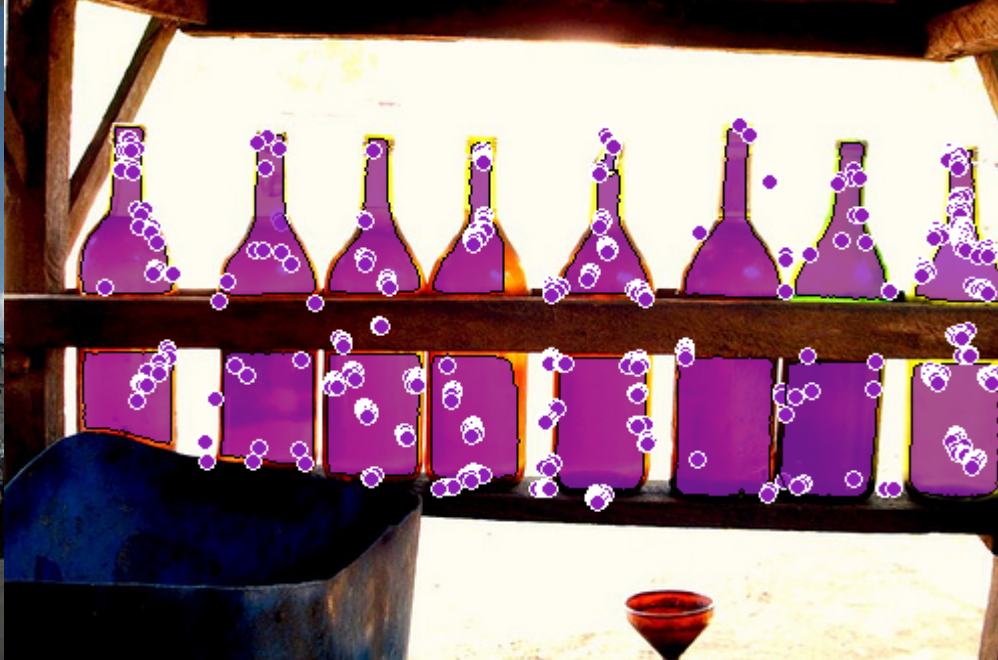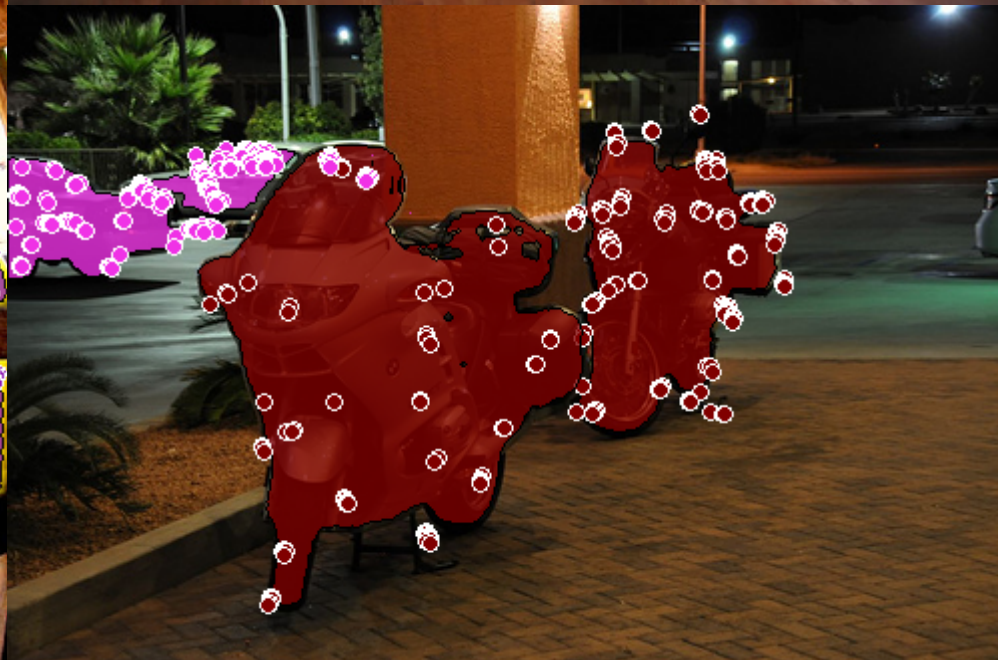

Supplement: supplementary_material [file attachment]

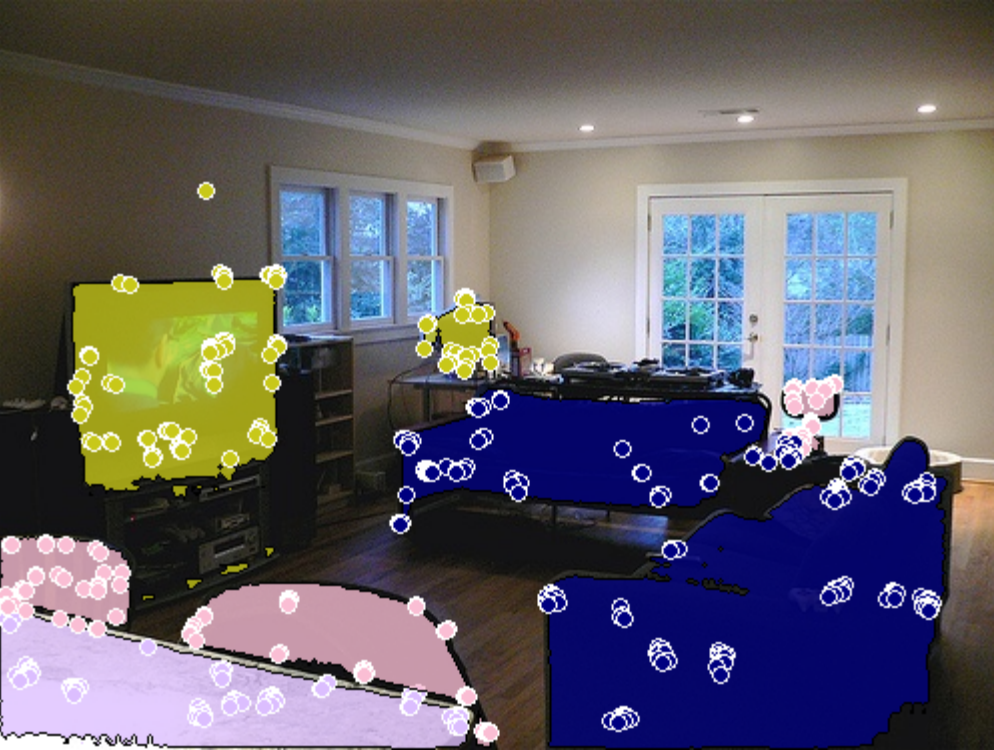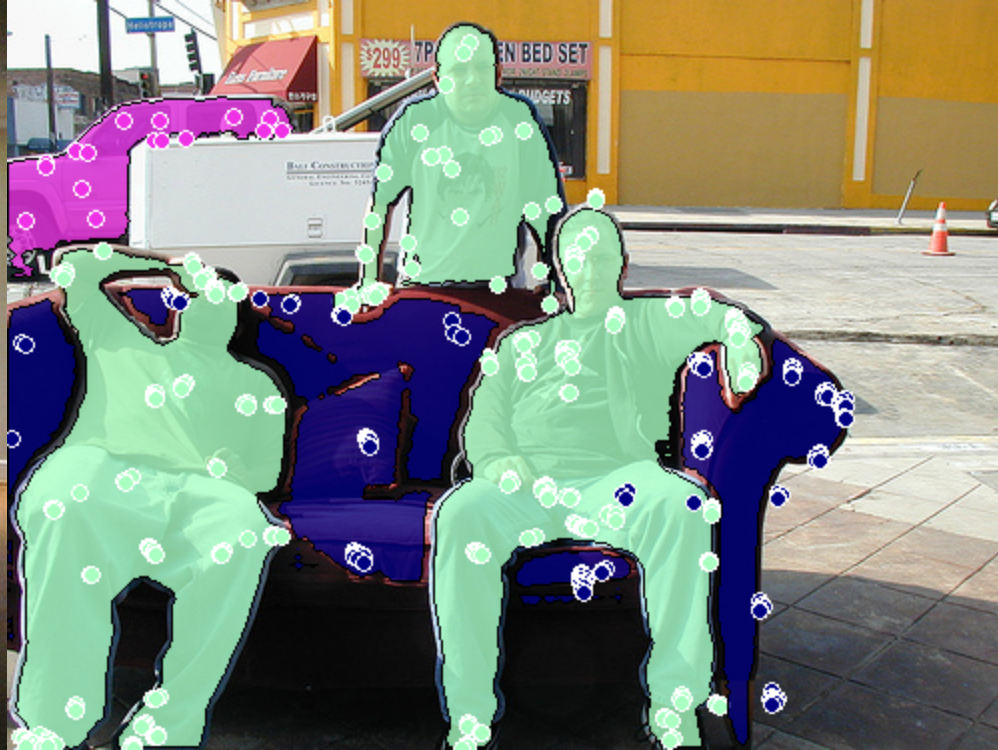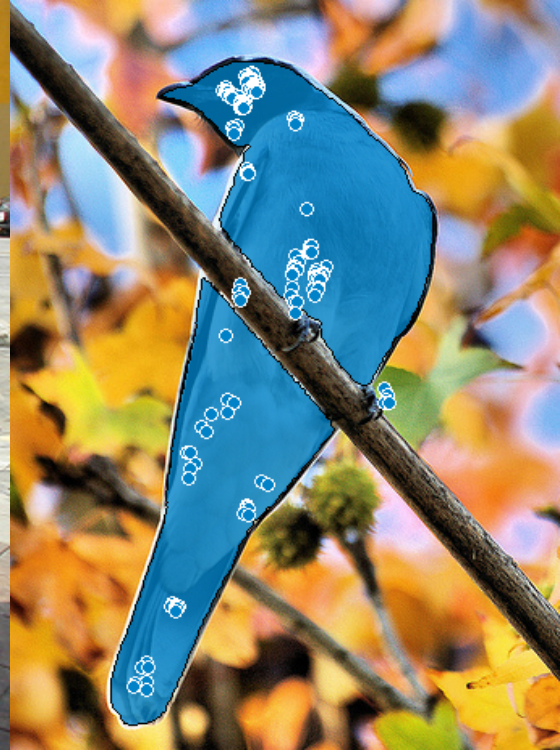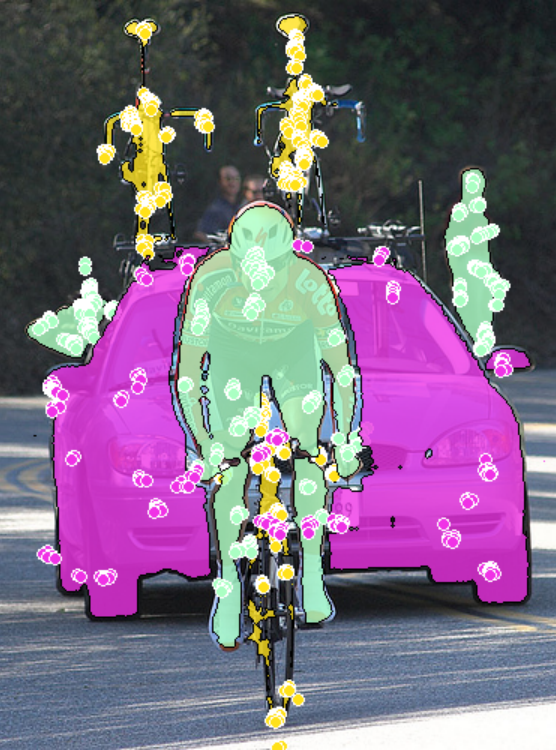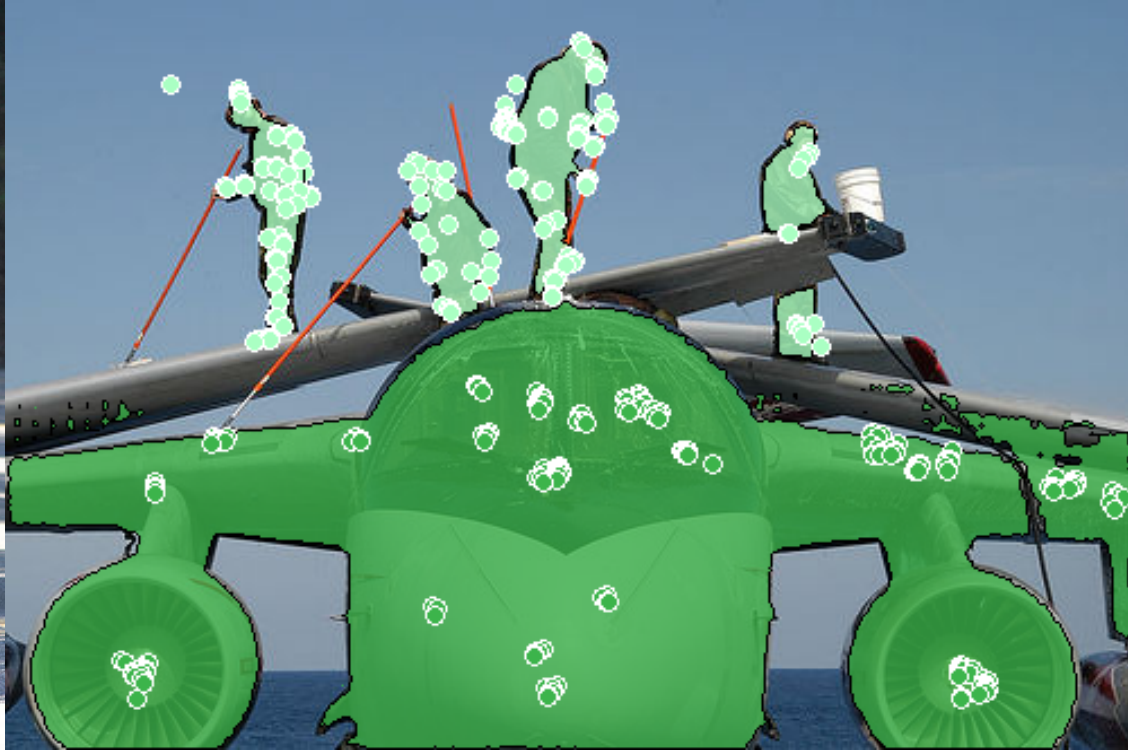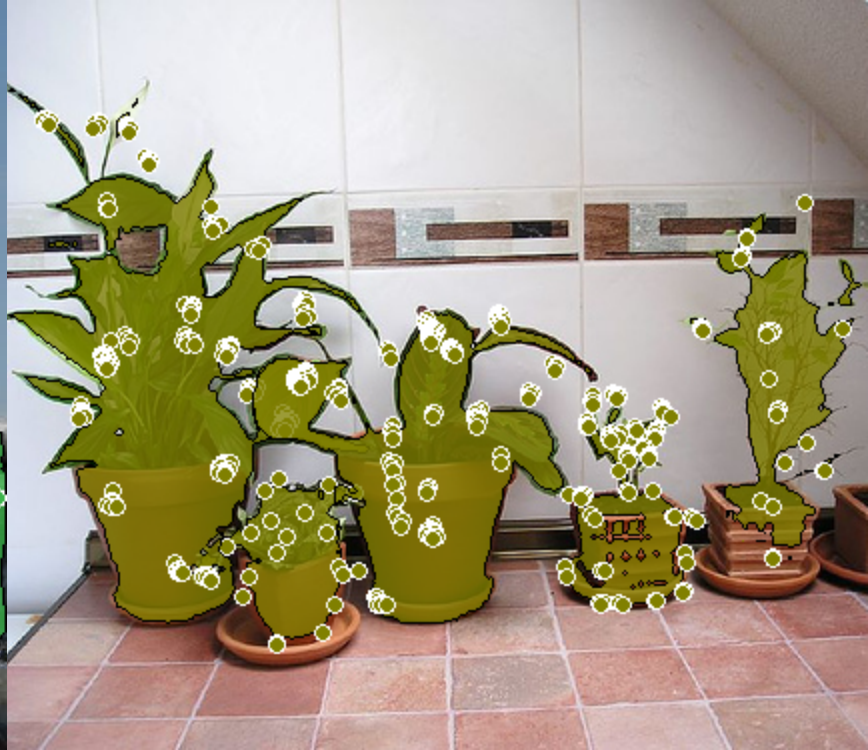

Supplement: supplementary_material [file attachment]

# Annotation Time per Class Category

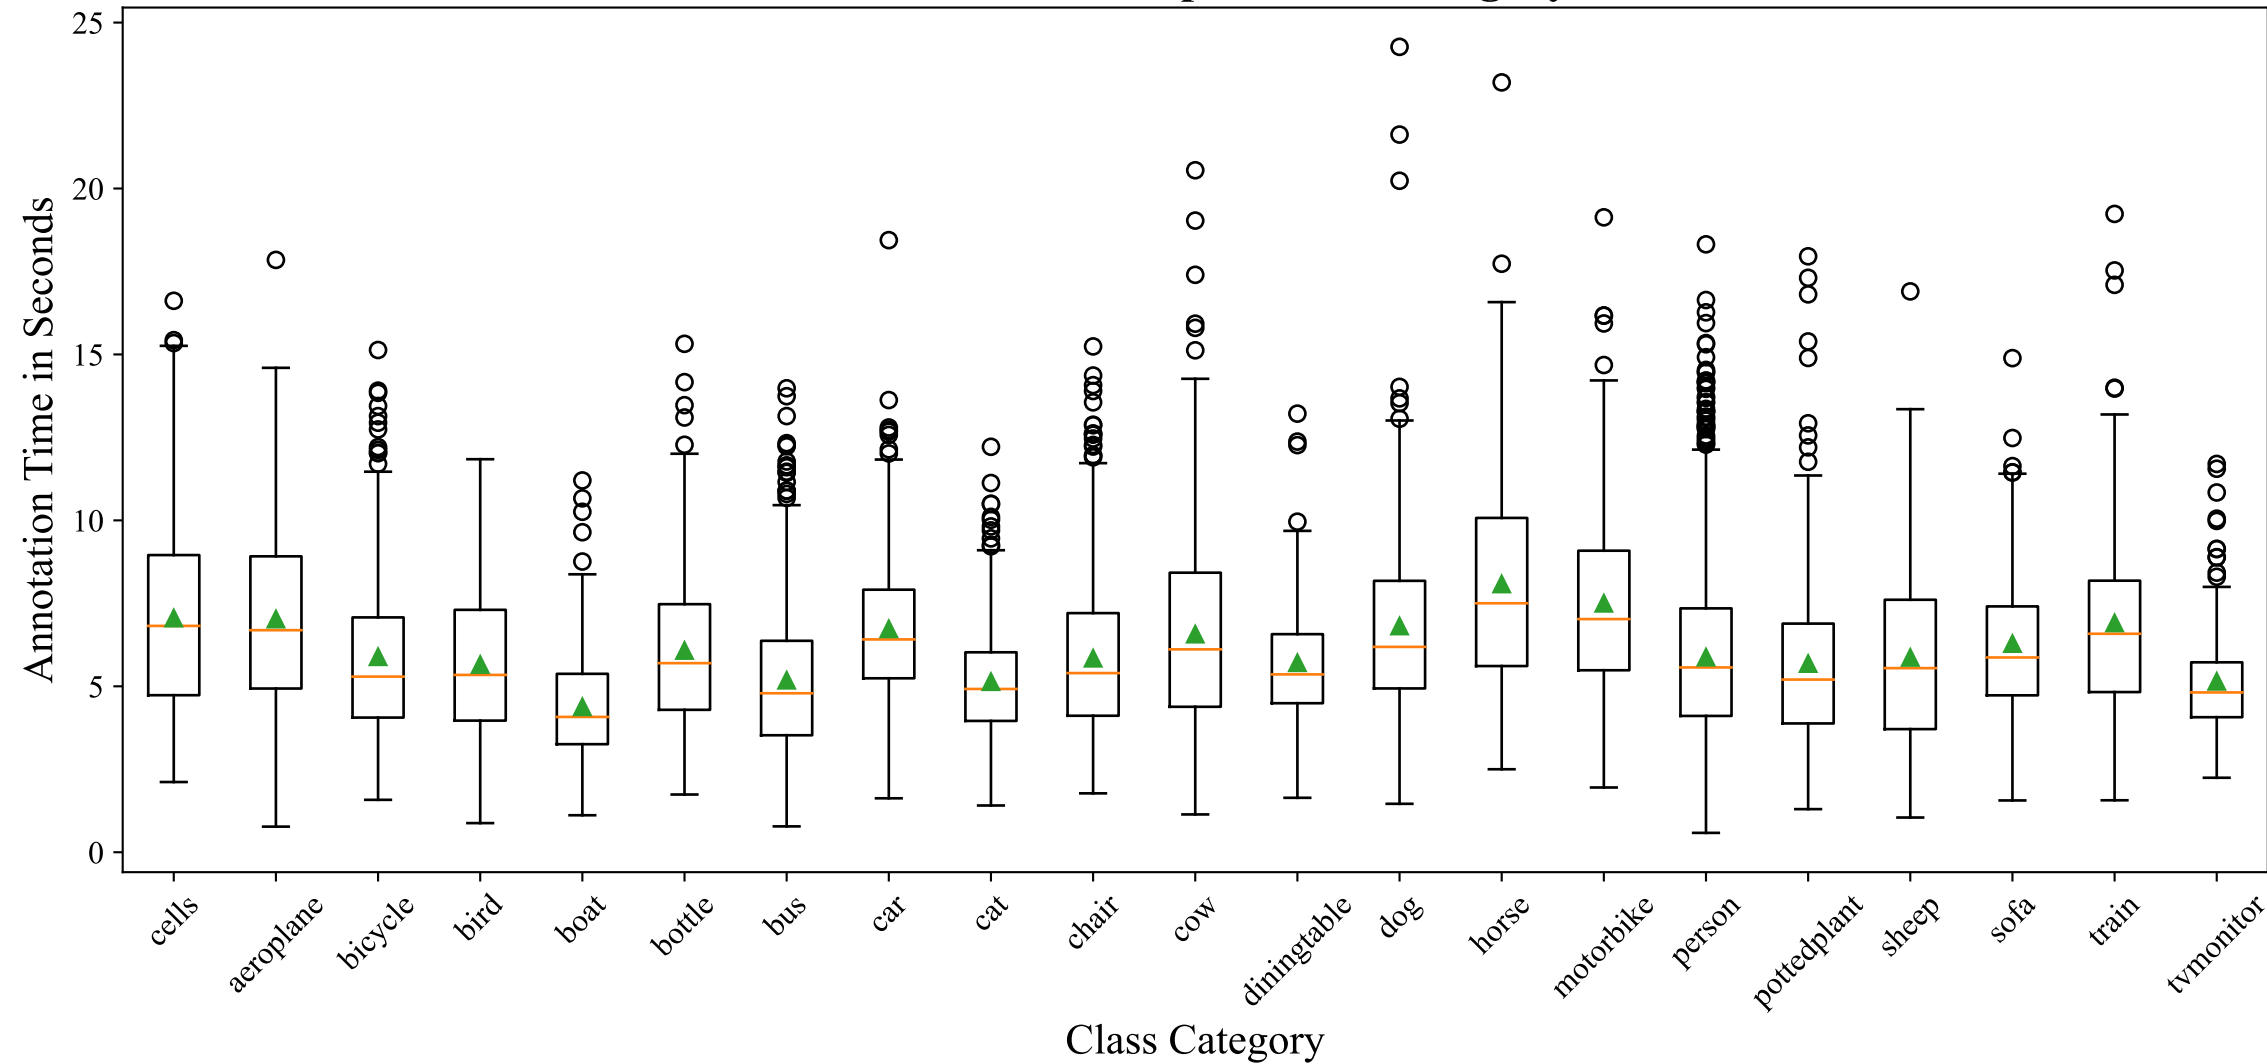

Supplement: supplementary_material [file attachment]

# Fixations

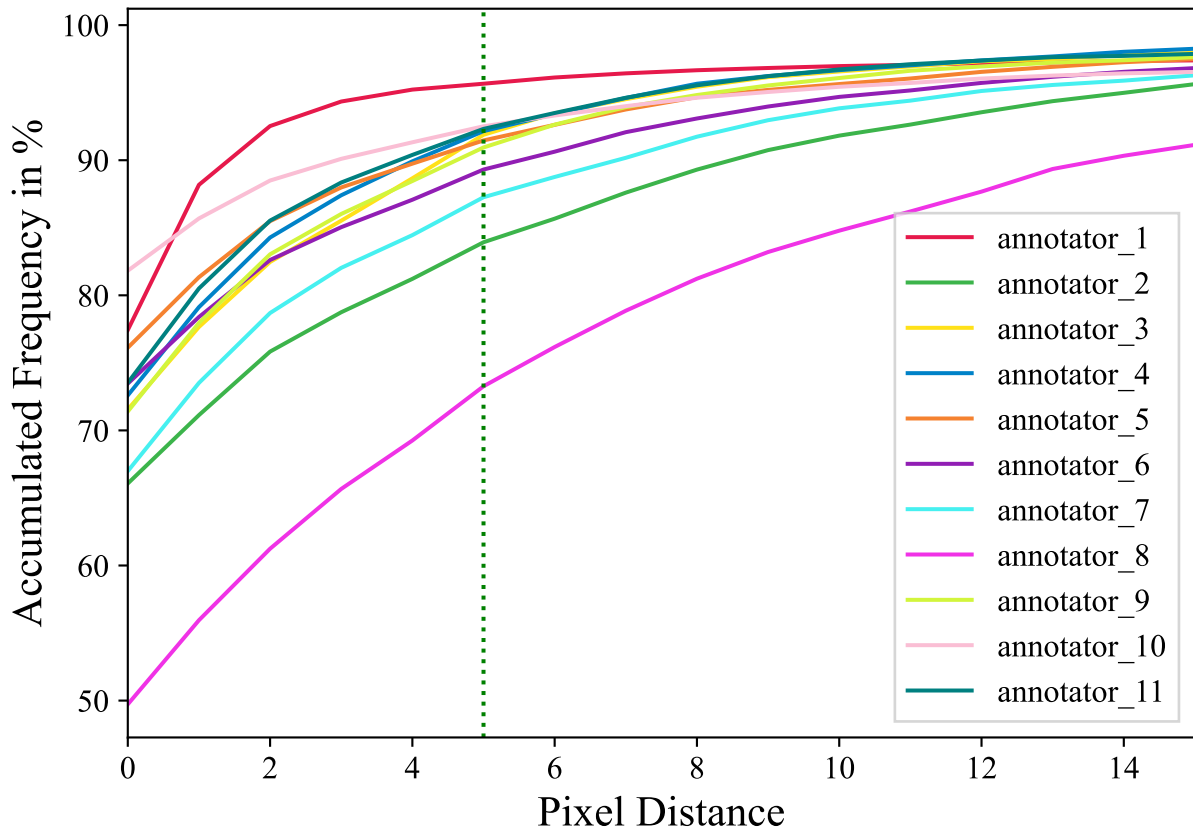

Supplement: supplementary_material [file attachment]

# Fixations

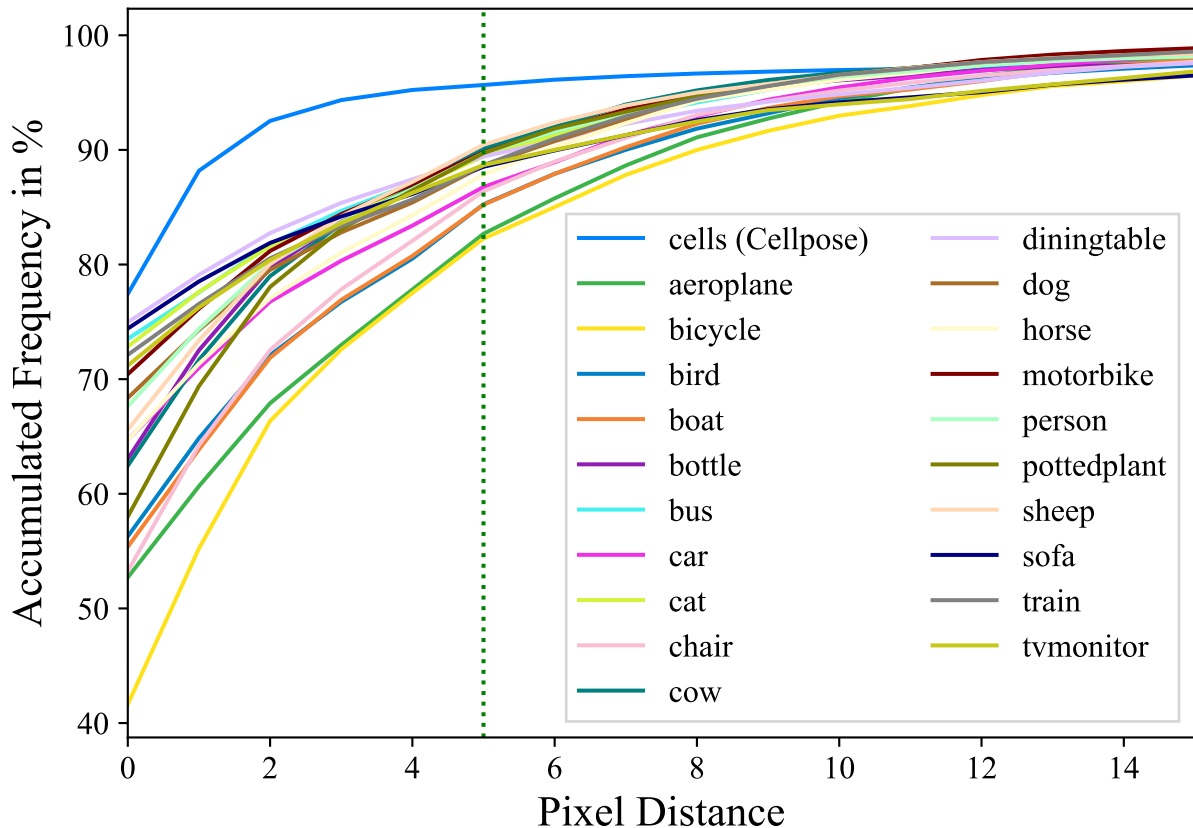

Supplement: supplementary_material [file attachment]

# Gaze Data

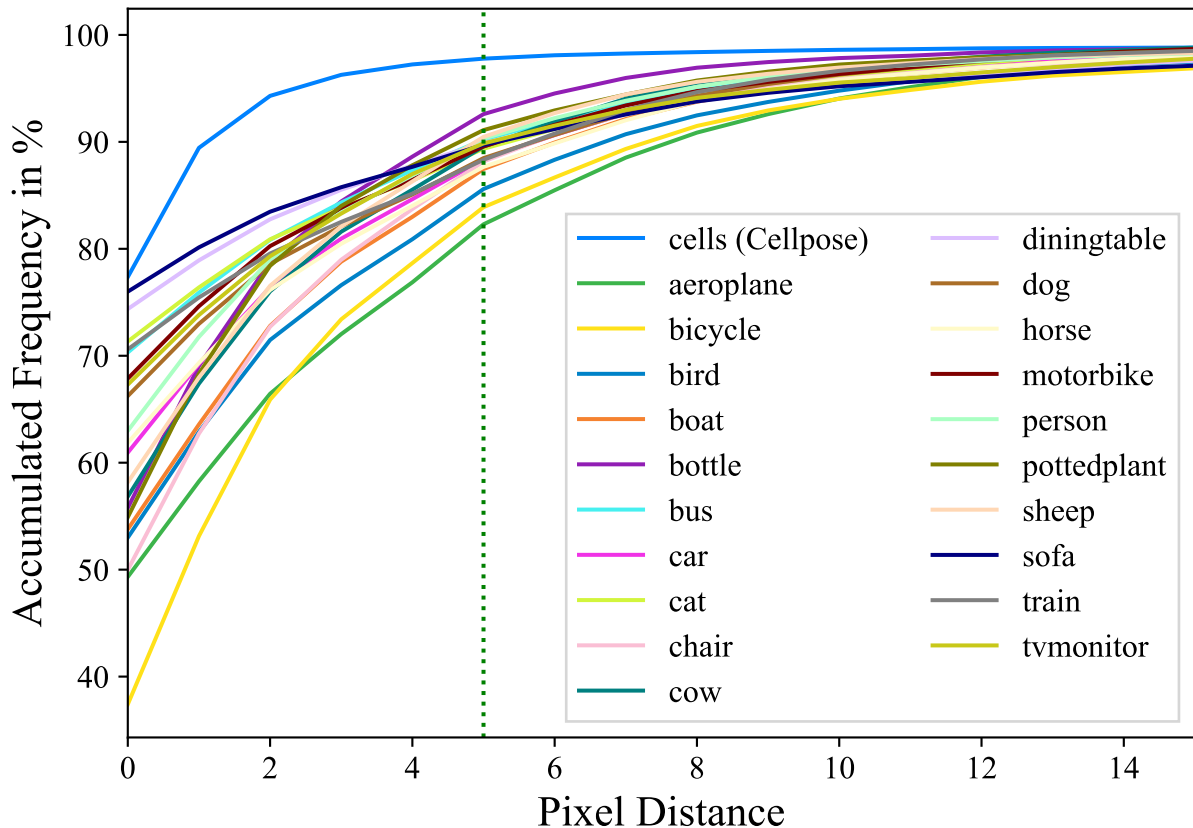

Supplement: supplementary_material [file attachment]

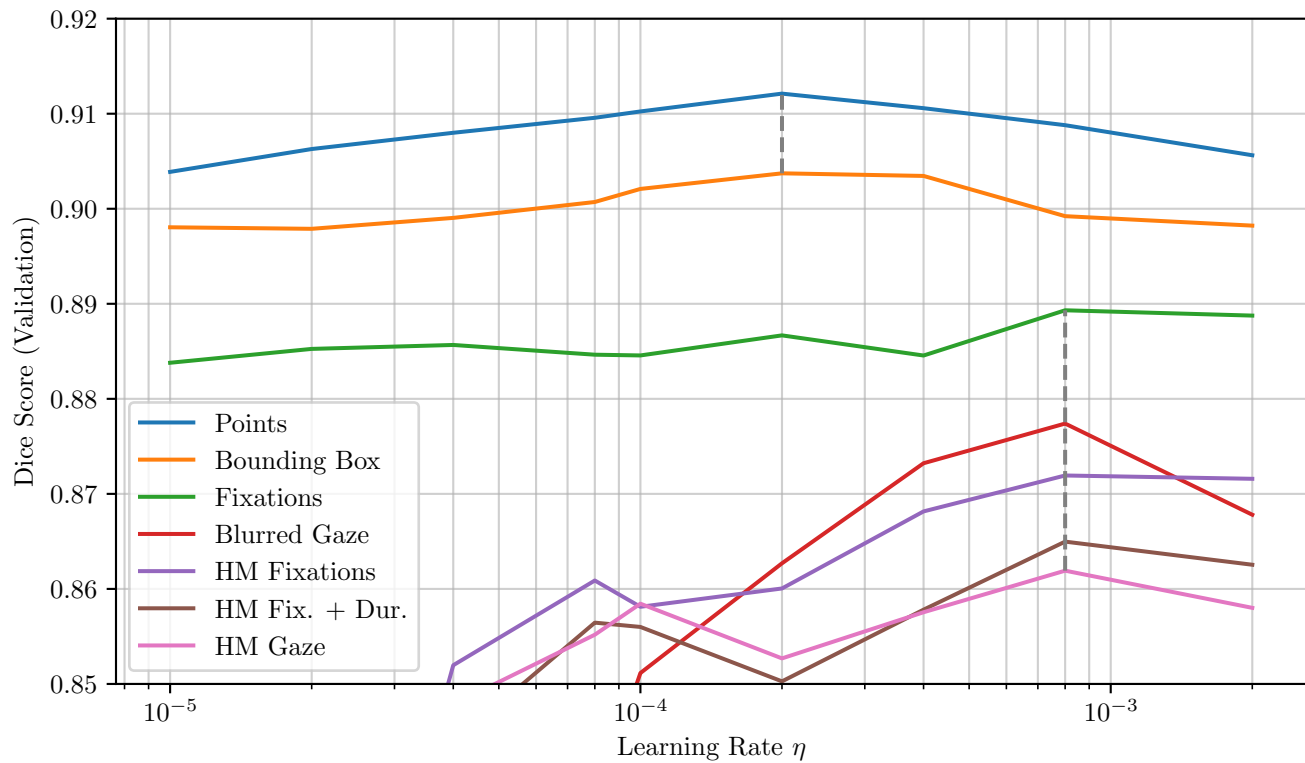

Supplement: supplementary_material [file attachment]

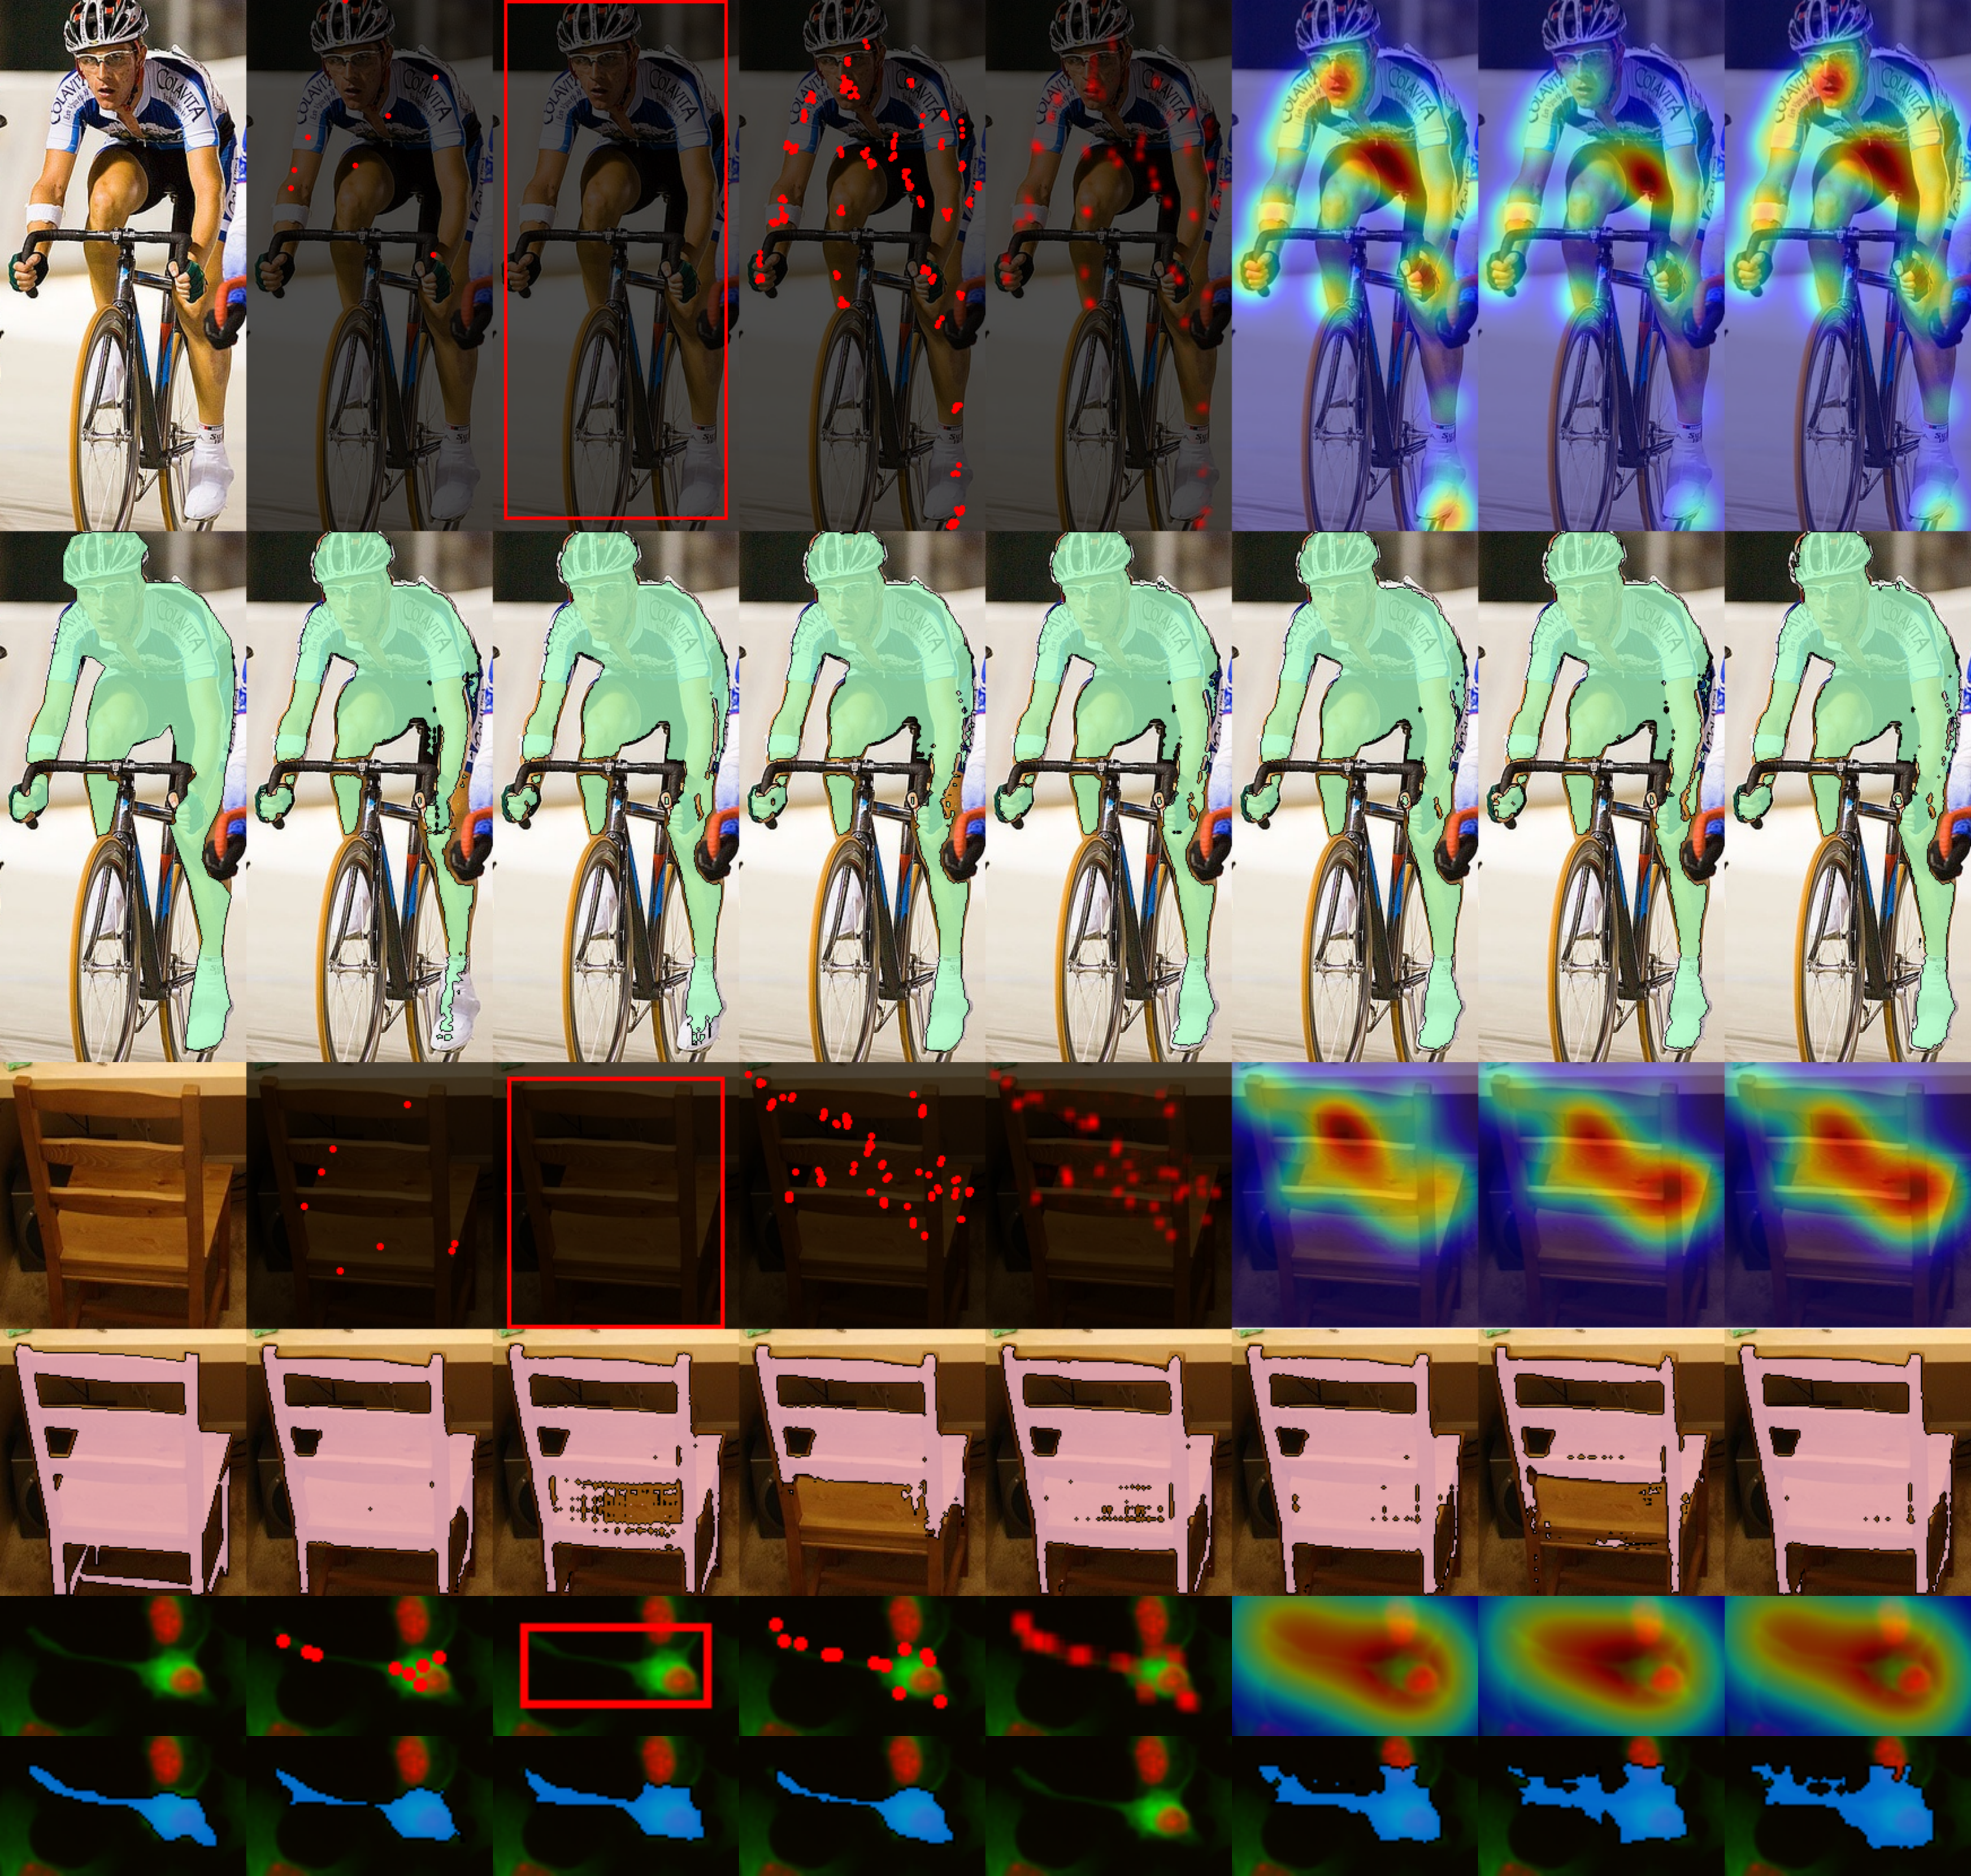

Supplement: supplementary_material [file attachment]

## Gaze and Fixation Points

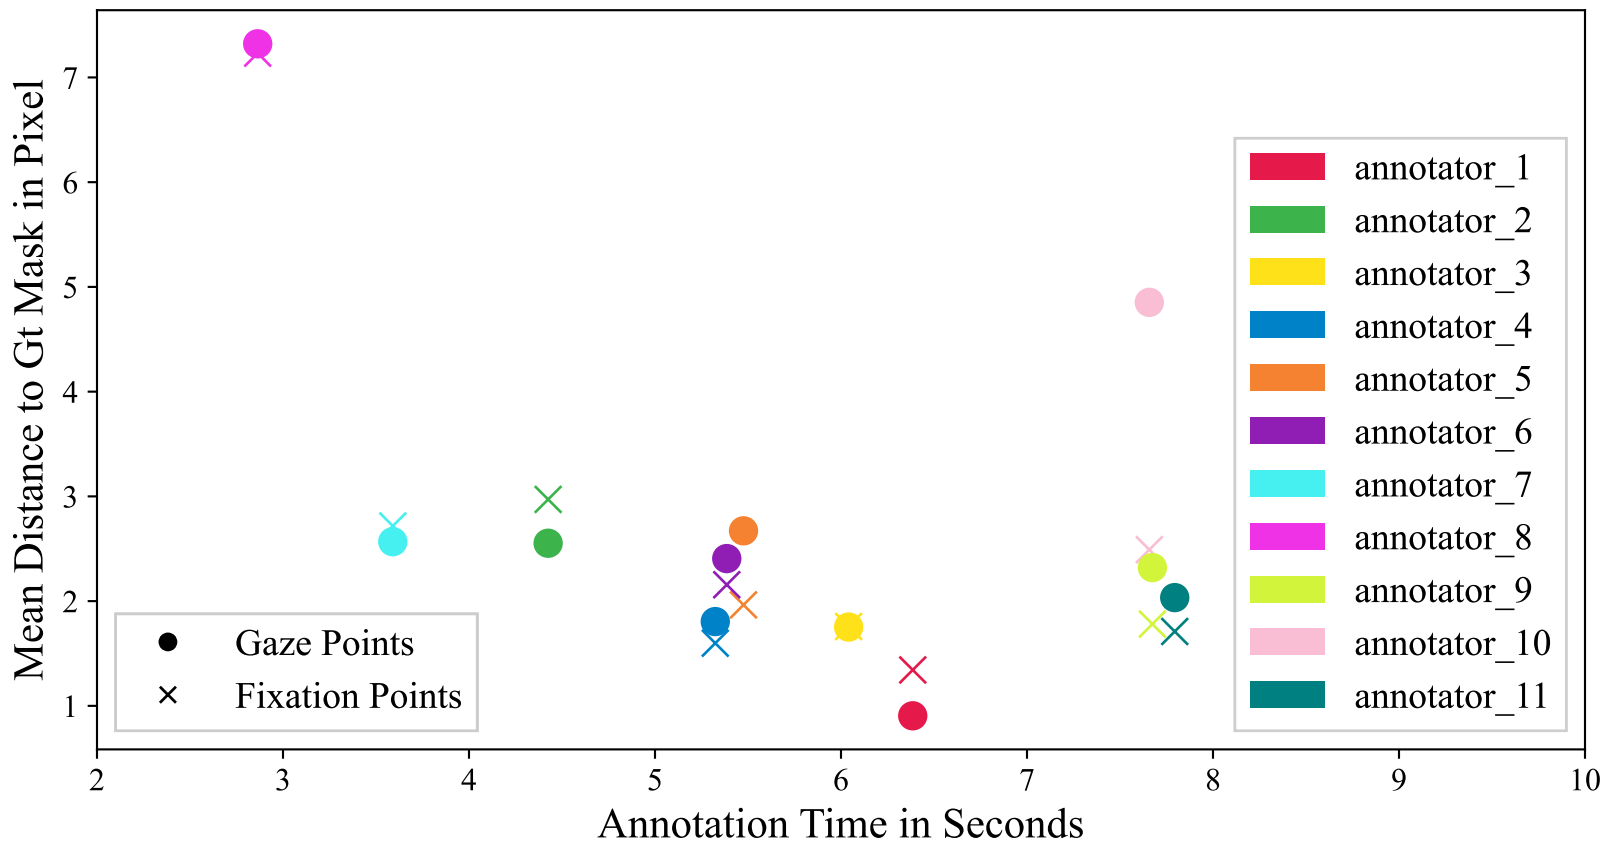

Supplement: supplementary_material [file attachment]

# Mean Annotation Time vs. Mean Convexity

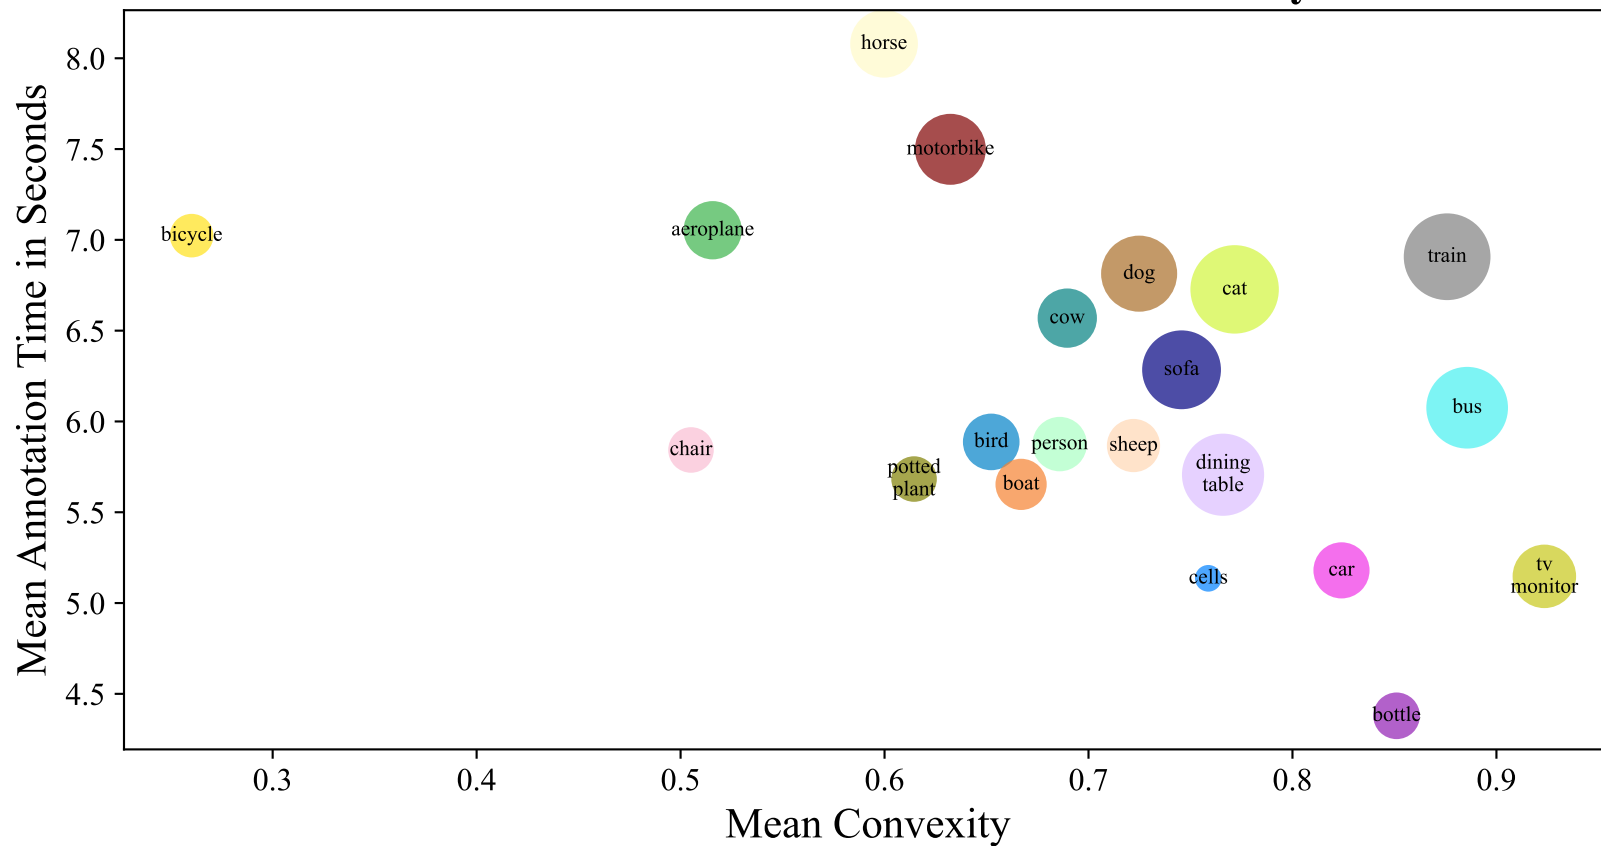

Supplement: supplementary_material [file attachment]

# Gaze Data

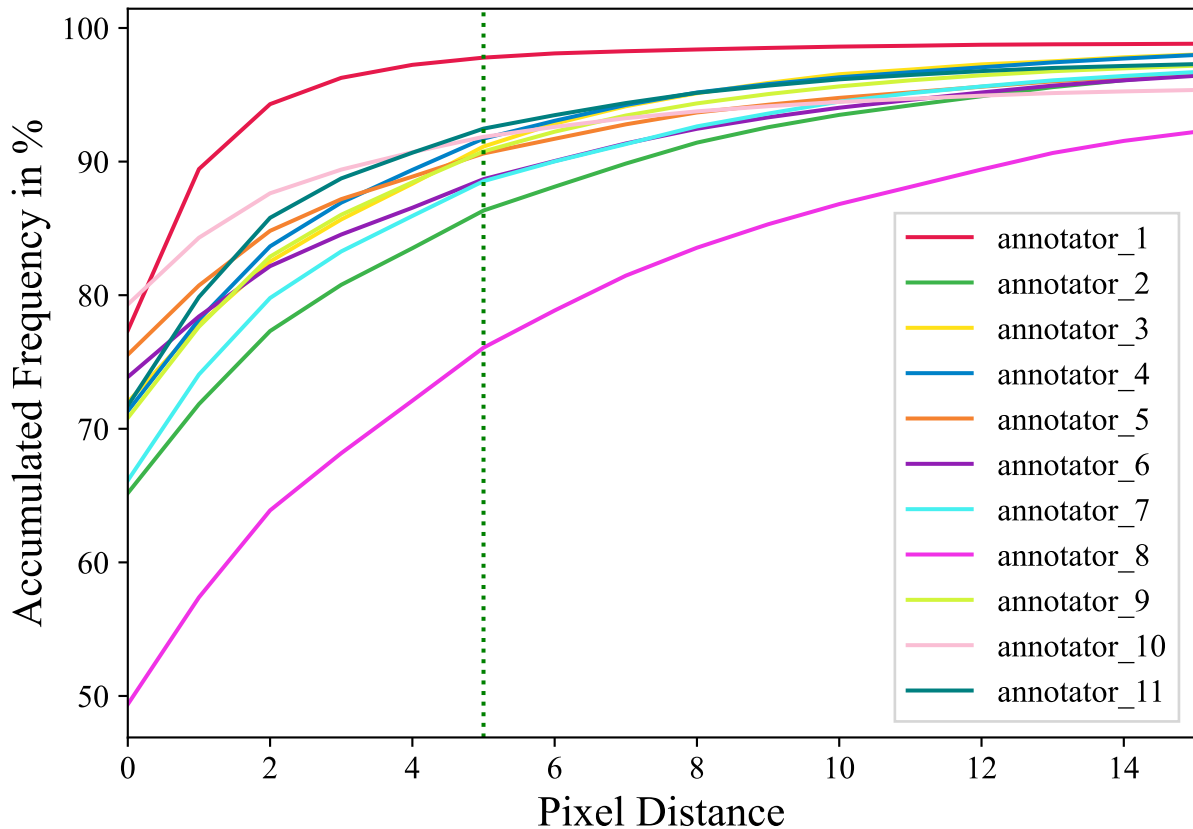

Supplement: supplementary_material [file attachment]
